1 **Title:**

2 Knowledge, Attitudes, and Practices Regarding Urinary Tract Infections Among Women in the United  
3 Arab Emirates

4 **Authors:**

5 Shaikha Salah Alhaj<sup>1\*</sup>, Sajad Allami<sup>1</sup>, Amjad Mohamadiyah<sup>1</sup>, Ammar Agha<sup>1</sup>, Abdul Kareem Abu Ali<sup>1</sup>,  
6 Joudi M Bassam Habbal<sup>1</sup>, Balsam Qubais Saeed<sup>2</sup>

7 **Affiliations:**

8 <sup>1</sup> College of Medicine, University of Sharjah, Sharjah, UAE

9 <sup>2</sup> Clinical Sciences Department, College of Medicine, University of Sharjah, Sharjah, UAE

10 **Corresponding Author:**

11 \* Shaikha Salah Alhaj

12 College of Medicine, University of Sharjah, Sharjah, UAE

13 Email: [shawa5i1@hotmail.com](mailto:shawa5i1@hotmail.com)

14 **Acknowledgments:**

15 None to Declare

16 **Abstract:**

17 **Background:**

18 Urinary tract infections (UTIs), which are infections of the kidneys, ureters, bladder, or urethra, are a  
19 worldwide public health concern. As compared to men, women are more prone to UTIs. There have been  
20 several studies that explore the knowledge, attitudes, and practices of women regarding UTIs in different  
21 countries, but no such study has been conducted in the UAE; therefore, we conducted this study in the  
22 UAE setting.

23 **Methods:**

24 This study was conducted using an online survey created on Microsoft Forms. The minimum sample size  
25 required for our study was 385. This study was conducted after obtaining ethical approval from the  
26 Research Ethics Committee at the University of Sharjah (Reference Number: REC-23-09-19-01-F). A  
27 personally designed questionnaire consisting of 21 items, derived from previous research was used to  
28 record data. The data was analyzed using SPSS.

29 **Results:**

30 A total of 475 females were included in the study. Most respondents were aged 18-30 years (47.4%). Our  
31 study found that a majority of the participants (69.7%) correctly identified bacteria as the most common  
32 cause of UTIs. With regards to practices undertaken during UTIs, among the participants with a history  
33 of UTI episodes, 32.6% waited 24-48 hours before seeking medical attention at a hospital or clinic, while  
34 10% did not visit a hospital at all. Distinct trends were found when comparing demographic factors with  
35 knowledge levels. Most notably, the age group of 18-30 years showed the highest percentage of high-  
36 knowledge individuals (49%) compared to other age groups ( $p < 0.05$ ). Education level was significantly  
37 ( $p = 0.003$ ) associated with UTI knowledge. Going to the hospital/clinic was reported by 41% with high  
38 knowledge but only by 20% of those with poor knowledge. Moreover, a higher proportion of individuals  
39 with high knowledge sought medical attention immediately within 24 hours (47%).

40 **Conclusion:**

41 Most of the participants possessed adequate knowledge regarding UTIs. Higher knowledge levels were  
42 associated with more proactive & appropriate health behaviors, such as seeking medical attention  
43 promptly & drinking more water.

## 44 **Introduction:**

45 Urinary tract infections (UTIs), which are infections of the kidneys, ureters, bladder, or urethra, are a  
46 worldwide public health concern [1]. According to a study, over 404.6 million people all around the  
47 globe had UTIs in 2019, and nearly 236,786 died as a result of UTIs the same year [2]. As compared to  
48 men, women are more prone to UTIs [1]. One of the reasons attributable to this fact is the presence of  
49 shorter urethra in women, which makes it easier for bacteria or other microbes to reach the bladder or  
50 urinary tract and cause infection [1, 3]. It is estimated that approximately 60% of females experience at  
51 least one UTI in their lifetime [3], which is more likely to occur in menopausal or pregnant women [3-4].  
52 The urinary system is designed to keep the foreign bacteria out, but sometimes, failure of host defenses  
53 to remove these bacteria can result in UTIs. *Escherichia coli* is the most associated bacteria with UTIs.  
54 Other causative pathogens include *Staphylococcus saprophyticus*, *Proteus*, *Klebsiella*, and *Pseudomonas*  
55 *aeruginosa* [5-6]. Additionally, certain risk factors predispose women to UTIs, which include pregnancy,  
56 sexual activity (new sexual partner), menopause, use of certain birth controls, catheters, or a suppressed  
57 immune system [5-6]. UTIs can be both symptomatic and asymptomatic. Symptomatic UTIs are  
58 characterized by painful and frequent urination, hematuria, suprapubic pain, and fever [4-5]. On the other  
59 hand, asymptomatic UTIs do not have any apparent symptoms but are characterized by the presence of  
60 bacteria in urine [5, 7]. However, both symptomatic and asymptomatic infections should be treated [7] to  
61 avoid further complications such as recurrent infections, kidney damage, bladder dysfunction, or preterm  
62 labor [6, 8].

63 Despite being preventable, UTIs are quite prevalent among women in the UAE [4]. They can be  
64 prevented by staying well-hydrated, maintaining hygiene, urinating after sexual activity, and raising  
65 awareness among girls and women [1, 6]. There have been several studies that explore the knowledge,  
66 attitudes, and practices of women regarding UTIs in different countries [9-10], but no such study has  
67 been conducted in the UAE; therefore, in this study, we aim to explore the knowledge, attitudes, and  
68 practices of women in the UAE regarding UTIs. The results of this study will aid us in determining the

69 level of awareness among them, which can contribute to targeted awareness campaigns and educational  
70 initiatives related to women's health.

71

## 72 **Methods & Materials:**

73 The Strengthening the Report of the Observational Studies in Epidemiology (STOBE) guidelines were  
74 used throughout conducting this study [11].

75

## 76 **Study Design:**

77 This study was a cross-sectional survey to assess the knowledge, attitude, and practices (KAP) regarding  
78 Urinary Tract Infections (UTI) among women in the United Arab Emirates (UAE).

79

## 80 **Study Settings and Selection of Participants:**

81 This study was conducted using an online survey created on Microsoft Forms. The minimum sample size  
82 required for our study was 385, collected using the Raosoft Sample Size Calculator with a confidence  
83 interval of 95%, a margin of error of 5%, and a population size of 3.2 million. The data for the  
84 population size of women in the UAE was used according to the latest population statistics [12].  
85 However, we calculated data from 475 participants. The inclusion criteria for participants included: i)  
86 females of any age; ii) residents of the UAE. The exclusion criteria included: i) males; ii) not a resident  
87 of the UAE.

88

## 89 **Ethics Statement:**

90 Data was collected from participants after obtaining informed consent. The online consent was taken  
91 prior to filling out the questionnaire. A brief summary of the questionnaire ahead was provided along  
92 with the purpose of filling out this form. It was clarified that participation is anonymous and voluntary.  
93 Only those who consented to participate could access the form ahead. In the case of minors, it was

94 mandatory that the consent form was filled out in the presence of parents or guardians. Participants were  
95 ensured that their information would be kept confidential. This study was conducted after obtaining  
96 ethical approval from the Research Ethics Committee at the University of Sharjah (Reference Number:  
97 REC-23-09-19-01-F).

98

### 99 **Data Collection and Statistical Analysis:**

100 A personally designed questionnaire consisting of 21 items, derived from previous research and expert  
101 opinion [9-10], was used to record data. It was divided into four sections: i) demographics details; ii)  
102 questions to determine knowledge of the respondents; iii) questions to determine the attitude of the  
103 respondents; iv) questions to determine practices of the respondents. Both English and Arabic versions of  
104 the questionnaire were used to collect data. Data collection was started on 24<sup>th</sup> October 2023 and we  
105 completed collecting data on 1<sup>st</sup> December 2023.

106 The data was collected and coded. It was then analyzed using IBM Statistical Package for Social  
107 Sciences (SPSS) for Windows, Version 21 (IBM Corp, Armonk, NY, USA). A descriptive analysis was  
108 run. A knowledge score was calculated, where a 0-1 score was categorized as poor knowledge, a 2-3  
109 score was categorized as moderate knowledge, and a 4-6 score was categorized as high knowledge. To  
110 study the association of factors with knowledge, a chi-square test was run, and a  $p < 0.05$  was used as the  
111 level of significance.

112

## 113 **Results:**

### 114 **1. Characteristics of the Study Population:**

115 A total of 475 females were included in the study. Most respondents were aged 18-30 years (47.4%).  
116 The participants were equally distributed between married (48.8%) and single (48.2%), with a small  
117 minority divided between divorced and widowed. A significant majority of the participants held a  
118 bachelor's degree (66.9%), followed by those with a high school diploma (18.1%). Most participants

119 lived in Sharjah and Dubai (73.1%), while the rest were distributed among the remaining emirates. 35  
120 participants (7.3%) had either diabetes or hypertension. A summary of the demographic characteristics  
121 of the participants is shown in *Table 1*.

122

123 **Table 1: Demographic Characteristics of the Participants**

124

| Variable                 | N   | %    |
|--------------------------|-----|------|
| <b>Age</b>               |     |      |
| <18                      | 16  | 3.4  |
| 18-30                    | 225 | 47.4 |
| 31-40                    | 113 | 23.8 |
| 41 and above             | 121 | 25.5 |
| <b>Marital Status</b>    |     |      |
| Divorced                 | 6   | 1.3  |
| Married                  | 232 | 48.8 |
| Single                   | 229 | 48.2 |
| Widow                    | 8   | 1.7  |
| <b>Educational Level</b> |     |      |
| Bachelor's degree        | 318 | 66.9 |
| Post Graduate Studies    | 66  | 13.9 |
| High school              | 86  | 18.1 |
| Primary/middle school    | 5   | 1.1  |
| <b>Emirate</b>           |     |      |
| Abu Dhabi                | 88  | 18.5 |
| Ajman                    | 31  | 6.5  |
| Dubai                    | 122 | 25.7 |
| Fujairah                 | 4   | 0.8  |
| Ras Al Khaimah           | 3   | 0.6  |
| Sharjah                  | 225 | 47.4 |
| Um al Quwain             | 2   | 0.4  |

125

126 **2. Knowledge of the Participants Regarding Urinary Tract Infections:**

127 Participants who responded 'No' to the question “Have you heard of the term urinary tract infection  
128 (UTI)?” were categorized as possessing a minimal level of knowledge (18.7%), and the questionnaire  
129 was subsequently concluded for them at that point. The most prevalent understanding of UTIs among  
130 these respondents is inflammation of the kidney, bladder, or urethra (53.5% chose “Can be in all the

131 above”), followed by 'Inflammation of the urethra' only (23.2%). A majority (69.7%) correctly identify  
 132 bacteria as the most common cause of UTIs. Additionally, most participants were able to accurately  
 133 identify the symptoms, habits that increase the risk, and preventive measures of UTIs.

134  
 135 **Table 2: Knowledge of the Participants Regarding Urinary Tract Infections**  
 136

| Variable                                                               | N   | %    |
|------------------------------------------------------------------------|-----|------|
| <b>Have they heard of the term UTI?</b>                                |     |      |
| No                                                                     | 89  | 18.7 |
| Yes                                                                    | 386 | 81.3 |
| <b>Definition of UTI</b>                                               |     |      |
| Inflammation of the bladder                                            | 17  | 4.4  |
| Inflammation of the kidney                                             | 2   | 0.5  |
| Inflammation of the urethra                                            | 110 | 28.5 |
| None of the above                                                      | 3   | 0.8  |
| All of the above*                                                      | 254 | 65.8 |
| <b>Most common cause of UTI</b>                                        |     |      |
| Bacteria*                                                              | 269 | 69.7 |
| Bad hygiene                                                            | 37  | 9.6  |
| Fungi                                                                  | 58  | 15.0 |
| Viruses                                                                | 22  | 5.7  |
| <b>Which symptom/s do you think occur with UTI?</b>                    |     |      |
| Pain during urination*                                                 | 351 | 19.5 |
| Change in the urine color/appearance*                                  | 302 | 16.8 |
| Abdominal pain*                                                        | 205 | 11.4 |
| Back pain*                                                             | 170 | 9.5  |
| Increase in the frequency of urination*                                | 251 | 14.0 |
| Leg pain                                                               | 31  | 1.7  |
| Fever*                                                                 | 199 | 11.1 |
| Constipation                                                           | 22  | 1.2  |
| A sudden desire to go to bathroom to urinate*                          | 266 | 14.8 |
| <b>Which habit/s do you think increases the chances of having UTI?</b> |     |      |
| Cleaning the genitalia from back to front*                             | 238 | 27.5 |
| Drinking a small amount of water*                                      | 334 | 38.6 |
| Delaying urination*                                                    | 267 | 30.8 |
| Urinating after sexual intercourse                                     | 10  | 1.2  |
| Cleaning the genitalia from front to back                              | 9   | 1.0  |
| Drinking large amounts of water                                        | 8   | 0.9  |
| <b>Which factor/s do you think prevent UTI?</b>                        |     |      |
| Cleaning the genitalia from back to front                              | 20  | 2.3  |
| Drinking a small amount of water                                       | 3   | 0.3  |
| Delaying urination                                                     | 5   | 0.6  |



|                                            |     |      |
|--------------------------------------------|-----|------|
| Urinating after sexual intercourse*        | 207 | 23.8 |
| Cleaning the genitalia from front to back* | 278 | 31.9 |
| Drinking large amounts of water*           | 358 | 41.1 |

137 \* represents the correct answers

138

### 139 3. Attitude of the Participants Regarding Urinary Tract Infections:

140 Most respondents (69.6%) believe that going to the hospital/clinic is the appropriate way to deal with a  
 141 UTI. Drinking more water is also a common response, with 19.2% of respondents suggesting this  
 142 method. 46.1% of respondents perceive UTI as a serious condition/disease. Some of the most commonly  
 143 believed complications of UTIs included “damage to the kidneys” and “decrease in quality of life”  
 144 (39.9% and 23.6%, respectively).

145

146 **Table 3: Attitude of the Participants Regarding Urinary Tract Infections**

147

| Variable                                                                     | N   | %    |
|------------------------------------------------------------------------------|-----|------|
| <b>In your opinion, what is the appropriate way of dealing with UTI?</b>     |     |      |
| Drink more water                                                             | 74  | 19.2 |
| Go to the Hospital/Clinic                                                    | 269 | 69.6 |
| I don't know                                                                 | 9   | 2.3  |
| Rest at home                                                                 | 1   | 0.3  |
| Shower more frequently                                                       | 6   | 1.6  |
| Take analgesics (painkillers)                                                | 1   | 0.3  |
| Take antibiotics directly                                                    | 26  | 6.7  |
| <b>Do you think UTIs are common?</b>                                         |     |      |
| Yes                                                                          | 363 | 94   |
| No                                                                           | 23  | 6    |
| <b>Which of the following statements do you think is true regarding UTI?</b> |     |      |
| I don't know                                                                 | 34  | 8.9  |
| UTIs affect both genders equally                                             | 52  | 13.5 |
| UTIs affect females more                                                     | 295 | 76.3 |
| UTIs affect males more                                                       | 5   | 1.3  |
| <b>Which complications do you expect from having a UTI?</b>                  |     |      |
| It can damage the kidneys                                                    | 289 | 39.9 |
| It can decrease the quality of life                                          | 171 | 23.6 |
| It can lead to recurrent UTIs                                                | 142 | 19.6 |
| It can affect pregnancies                                                    | 85  | 11.8 |
| It can lead to death                                                         | 29  | 4    |
| It can cause weight loss                                                     | 8   | 1.1  |

| <b>Do you feel UTI is a serious condition/disease?</b> |     |      |
|--------------------------------------------------------|-----|------|
| I don't know                                           | 70  | 18.1 |
| Yes                                                    | 178 | 46.1 |
| No                                                     | 138 | 35.8 |

148

149 **4. Practices of the Participants Regarding Urinary Tract Infections:**

150 With regards to practices undertaken during UTIs, among the participants with a history of UTI  
 151 episodes, 56 (32.6%) waited 24-48 hours before seeking medical attention at a hospital or clinic, while  
 152 17 (10%) did not visit a hospital at all. The most common initial actions taken by these participants  
 153 included visiting a hospital or clinic and increasing water intake (48% and 38.5%, respectively).

154

155 **Table 4: Practices of the Participants Regarding Urinary Tract Infections**

156

| <b>Variable</b>                                                           | <b>N</b> | <b>%</b> |
|---------------------------------------------------------------------------|----------|----------|
| <b>Have you ever had a UTI before?</b>                                    |          |          |
| Yes                                                                       | 172      | 44.6     |
| No                                                                        | 214      | 55.4     |
| <b>What did you do when you felt symptoms of UTI?</b>                     |          |          |
| Drank more water                                                          | 114      | 38.5     |
| Go to the hospital/clinic                                                 | 142      | 48.0     |
| Had rest at home                                                          | 6        | 2.0      |
| Took antibiotics directly                                                 | 8        | 2.7      |
| Took more showers                                                         | 5        | 1.7      |
| Took analgesics (painkillers)                                             | 19       | 6.4      |
| I don't remember                                                          | 2        | 0.7      |
| <b>If yes, how long did you wait before visiting the hospital/clinic?</b> |          |          |
| < 24 hours                                                                | 49       | 28.4     |
| 24-48 hours                                                               | 56       | 32.6     |
| 2-5 days                                                                  | 32       | 18.6     |
| More than 5 days                                                          | 18       | 10.4     |
| I did not go to the hospital                                              | 17       | 10       |
| <b>Which symptoms do you have?</b>                                        |          |          |
| Pain during urination                                                     | 129      | 23.5     |
| Change in the urine color & appearance                                    | 83       | 15.1     |
| Back pain                                                                 | 55       | 10.0     |
| Increase in the frequency of urination                                    | 94       | 17.2     |
| A sudden desire to go to bathroom to urinate                              | 87       | 15.9     |
| Fever                                                                     | 33       | 6.0      |
| Abdominal pain                                                            | 67       | 12.2     |

| How much water do you drink per day? |     |      |
|--------------------------------------|-----|------|
| < 0.5 Litres                         | 34  | 8.8  |
| 0.5 Litres to 1 Litre                | 159 | 41.2 |
| 1 Litre to 2 Litres                  | 142 | 36.8 |
| More than 2 Litres                   | 51  | 13.2 |

157

## 158 5. Outcomes of Consultation:

159 Regarding participants' expectation of consultation outcomes, participants were required to rank four  
160 possible outcomes of a visit to the GP in order of importance. The majority of the participants (44%)  
161 ranked Confirmation of UTI Diagnosis as the most important factor, with a mean ranking of 1.71.  
162 However, the least prioritized outcome was Obtaining an Antibiotic Prescription (3%), with a mean  
163 ranking of 3.04.

164

### 165 Table 5: Ranking of the Outcomes of Consultation

| Outcome of Consultation                  | N  | % prioritized as the most important | Mean Score |
|------------------------------------------|----|-------------------------------------|------------|
| Confirmation of UTI diagnosis            | 75 | 44                                  | 1.71       |
| Pain relief                              | 48 | 28                                  | 2.49       |
| Obtaining advice on when to contact a GP | 43 | 25                                  | 2.74       |
| Obtaining an antibiotic prescription     | 5  | 3                                   | 3.04       |

166

167 GP = General Practitioner

168

## 169 6. Association of Level of Knowledge Regarding UTI with Demographics:

170 Distinct trends were found when comparing demographic factors with knowledge levels. Most notably,  
171 the age group of 18-30 years showed the highest percentage of high-knowledge individuals (49%)  
172 compared to other age groups, while individuals below 18 years predominantly (75%) had poor  
173 knowledge about UTIs ( $p = <0.05$ ). Education level was significantly ( $p = 0.003$ ) associated with UTI  
174 knowledge as Individuals with higher educational qualifications, such as a bachelor's degree or  
175 postgraduate studies, displayed a lower percentage of poor knowledge about UTIs (34% and 21%,  
176 respectively). Moreover, the highest percentage (41%) of high-knowledge individuals was found in the

177 postgraduate group. Marital status also exhibited a significant ( $p = <0.05$ ) association with knowledge,  
 178 with single individuals demonstrating high levels of knowledge (47%) compared to divorced or married  
 179 counterparts. While geographical differences in knowledge levels were noted across various Emirates,  
 180 these were not statistically significant ( $p = 0.174$ ).

181  
 182

183 **Table 6: Association of Level of Knowledge of Participants Regarding UTI with**  
 184 **Demographic Characteristics:**

| Variable                 | Poor Knowledge |     | Moderate Knowledge |     | High Knowledge |     | p-value         |
|--------------------------|----------------|-----|--------------------|-----|----------------|-----|-----------------|
|                          | N              | n   | %                  | n   | %              | n   |                 |
| <b>Age</b>               |                |     |                    |     |                |     | <b>&lt;0.05</b> |
| <18                      | 16             | 12  | 75                 | 1   | 6              | 3   | 19              |
| 18-30                    | 225            | 63  | 28                 | 52  | 23             | 110 | 49              |
| 31-40                    | 113            | 43  | 38                 | 44  | 39             | 26  | 23              |
| 41 and above             | 121            | 39  | 32                 | 47  | 39             | 35  | 29              |
| <b>Marital Status</b>    |                |     |                    |     |                |     | <b>&lt;0.05</b> |
| Divorced                 | 8              | 4   | 50                 | 4   | 50             | 0   | 0               |
| Married                  | 232            | 78  | 34                 | 88  | 38             | 66  | 28              |
| Single                   | 229            | 73  | 32                 | 49  | 21             | 107 | 47              |
| Widow                    | 6              | 2   | 33                 | 3   | 50             | 1   | 17              |
| <b>Educational Level</b> |                |     |                    |     |                |     | <b>0.003</b>    |
| Bachelor's degree        | 318            | 107 | 34                 | 97  | 30             | 114 | 36              |
| Post Graduate Studies    | 66             | 14  | 21                 | 25  | 38             | 66  | 28              |
| High school              | 86             | 33  | 38                 | 20  | 23             | 33  | 38              |
| Primary/middle school    | 3              | 1   | 33                 | 2   | 67             | 0   | 0               |
| <b>Emirate</b>           |                |     |                    |     |                |     | <b>0.174</b>    |
| Abu Dhabi                | 88             | 35  | 40                 | 25  | 28             | 28  | 32              |
| Ajman                    | 31             | 5   | 16                 | 12  | 39             | 14  | 45              |
| Dubai                    | 122            | 45  | 37                 | 31  | 25             | 46  | 38              |
| Fujairah                 | 4              | 1   | 25                 | 2   | 50             | 1   | 25              |
| Ras Al Khaimah           | 3              | 3   | 100                | 0   | 0              | 0   | 0               |
| Sharjah                  | 225            | 67  | 30                 | 74  | 33             | 84  | 37              |
| Um al Quwain             | 2              | 1   | 50                 | 0   | 0              | 1   | 50              |
| <b>Total</b>             | 475            | 157 | 33                 | 144 | 30             | 174 | 37              |

185  
 186

187

188 **7. Association of Level of Knowledge with Attitudes of Participants Regarding UTI:**

189 Individuals with a high level of knowledge about UTIs were significantly ( $p = <0.05$ ) associated with a  
190 greater likelihood of recognizing the seriousness of UTIs (63% of the participants who believed that  
191 UTIs are serious and were categorized as having high knowledge also) and their potential complications  
192 such as damage to the kidneys and leading to recurrent UTIs.

193 The belief that UTIs are more common in females was prevalent across all knowledge levels but was  
194 most pronounced (52%) in the high-knowledge group.

195

196 **Table 7: Association of Level of Knowledge with Attitudes of Participants Regarding UTI:**

197

| Variable                                                                     | Poor Knowledge |           |           | Moderate Knowledge |           | High Knowledge |           |
|------------------------------------------------------------------------------|----------------|-----------|-----------|--------------------|-----------|----------------|-----------|
|                                                                              | N              | n         | %         | n                  | %         | n              | %         |
| <b>In your opinion, what is the appropriate way of dealing with UTI?</b>     |                |           |           |                    |           |                |           |
| Drink more water                                                             | 74             | 24        | 32        | 27                 | 36        | 23             | 31        |
| Go to the Hospital/Clinic                                                    | 269            | 32        | 12        | 101                | 38        | 136            | 51        |
| I don't know                                                                 | 9              | 2         | 22        | 3                  | 33        | 4              | 44        |
| Rest at home                                                                 | 1              | 0         | 0         | 0                  | 0         | 1              | 100       |
| Shower more frequently                                                       | 6              | 1         | 17        | 2                  | 33        | 3              | 50        |
| Take analgesics (painkillers)                                                | 1              | 0         | 0         | 0                  | 0         | 1              | 100       |
| Take antibiotics directly                                                    | 26             | 9         | 35        | 11                 | 42        | 6              | 23        |
| <b>Do you think UTIs are common?</b>                                         |                |           |           |                    |           |                |           |
| Yes                                                                          | 363            | 64        | 18        | 130                | 36        | 169            | 47        |
| No                                                                           | 23             | 4         | 17        | 14                 | 61        | 5              | 22        |
| <b>Which of the following statements do you think is true regarding UTI?</b> |                |           |           |                    |           |                |           |
| I don't know                                                                 | 34             | 13        | 38        | 16                 | 47        | 5              | 15        |
| UTIs affect both genders equally                                             | 52             | 16        | 31        | 19                 | 37        | 17             | 33        |
| UTIs affect females more                                                     | 295            | 39        | 13        | 104                | 35        | 152            | 52        |
| UTIs affect males more                                                       | 5              | 0         | 0         | 5                  | 100       | 0              | 0         |
| <b>Which complications do you expect from having a UTI?</b>                  |                |           |           |                    |           |                |           |
| It can damage the kidneys                                                    | 289            | 37        | 13        | 107                | 37        | 145            | 50        |
| It can decrease the quality of life                                          | 171            | 22        | 13        | 50                 | 29        | 99             | 58        |
| It can lead to recurrent UTIs                                                | 142            | 5         | 4         | 33                 | 23        | 104            | 73        |
| It can affect pregnancies                                                    | 85             | 4         | 5         | 18                 | 21        | 63             | 74        |
| It can lead to death                                                         | 29             | 0         | 0         | 2                  | 7         | 27             | 93        |
| It can cause weight loss                                                     | 8              | 0         | 0         | 3                  | 38        | 5              | 63        |
| <b>Do you feel UTI is a serious condition/disease?</b>                       |                |           |           |                    |           |                |           |
| I don't know                                                                 | 70             | 14        | 20        | 43                 | 61        | 13             | 19        |
| Yes                                                                          | 178            | 23        | 13        | 42                 | 24        | 113            | 63        |
| No                                                                           | 138            | 31        | 3         | 59                 | 5         | 48             | 4         |
| <b>Total</b>                                                                 | <b>386</b>     | <b>68</b> | <b>18</b> | <b>144</b>         | <b>37</b> | <b>174</b>     | <b>45</b> |

198

199 **8. Association of Level of Knowledge with Practices of Participants Regarding UTI:**

200 Higher knowledge levels were associated with more proactive and appropriate health behaviors, such as  
201 seeking medical attention promptly and drinking more water. Going to the hospital/clinic was reported  
202 41% with high knowledge but only by 20% of those with poor knowledge. Moreover, a higher  
203 proportion of individuals with high knowledge sought medical attention immediately within 24 hours  
204 (47%). Drinking more water was a common action across all knowledge levels, but more prevalent in

205 the high-knowledge group (41%). Individuals with higher knowledge tended to drink more water, with  
206 50% of those consuming 1-2 liters having high knowledge and 35% consuming more than 2 liters daily.

207

208 **Table 8: Association of Level of Knowledge with Practices of Participants Regarding UTI:**

209

| Variable                                                                  | Poor Knowledge |            |           | Moderate Knowledge |           | High Knowledge |           |
|---------------------------------------------------------------------------|----------------|------------|-----------|--------------------|-----------|----------------|-----------|
|                                                                           | N              | n          | %         | n                  | %         | n              | %         |
| <b>Have you ever had a UTI before?</b>                                    |                |            |           |                    |           |                |           |
| Yes                                                                       | 386            | 68         | 18        | 144                | 37        | 174            | 45        |
| No                                                                        | 89             | 89         | 100       | 0                  | 0         | 0              | 0         |
| <b>Total</b>                                                              | <b>475</b>     | <b>157</b> | <b>33</b> | <b>144</b>         | <b>30</b> | <b>174</b>     | <b>37</b> |
| <b>What did you do when you felt symptoms of UTI?</b>                     |                |            |           |                    |           |                |           |
| Drank more water                                                          | 114            | 25         | 22        | 42                 | 37        | 47             | 41        |
| Go to the hospital/clinic                                                 | 142            | 29         | 20        | 55                 | 39        | 58             | 41        |
| Had rest at home                                                          | 6              | 0          | 0         | 1                  | 17        | 5              | 83        |
| Took antibiotics directly                                                 | 8              | 0          | 0         | 2                  | 25        | 6              | 75        |
| Took more showers                                                         | 5              | 1          | 20        | 3                  | 60        | 1              | 20        |
| Took analgesics (painkillers)                                             | 19             | 5          | 26        | 7                  | 37        | 7              | 37        |
| I don't remember                                                          | 2              | 0          | 0         | 1                  | 50        | 1              | 50        |
| <b>Total</b>                                                              | <b>170</b>     | <b>37</b>  | <b>22</b> | <b>64</b>          | <b>38</b> | <b>69</b>      | <b>41</b> |
| <b>If yes, how long did you wait before visiting the hospital/clinic?</b> |                |            |           |                    |           |                |           |
| < 24 hours                                                                | 49             | 8          | 16        | 18                 | 37        | 23             | 47        |
| 24-48 hours                                                               | 56             | 14         | 25        | 23                 | 41        | 19             | 34        |
| 2-5 days                                                                  | 32             | 8          | 25        | 12                 | 38        | 12             | 38        |
| More than 5 days                                                          | 18             | 5          | 28        | 8                  | 44        | 5              | 28        |
| I did not go to the hospital                                              | 17             | 4          | 24        | 3                  | 18        | 10             | 59        |
| <b>Total</b>                                                              | <b>172</b>     | <b>39</b>  | <b>23</b> | <b>64</b>          | <b>37</b> | <b>69</b>      | <b>40</b> |
| <b>Which symptoms do you have?</b>                                        |                |            |           |                    |           |                |           |
| Pain during urination                                                     | 129            | 24         | 19        | 48                 | 37        | 57             | 44        |
| Change in the urine color & appearance                                    | 83             | 13         | 16        | 33                 | 40        | 37             | 45        |
| Back pain                                                                 | 55             | 10         | 18        | 22                 | 40        | 23             | 42        |
| Increase in the frequency of urination                                    | 94             | 12         | 13        | 36                 | 38        | 46             | 49        |
| A sudden desire to go to bathroom to urinate                              | 87             | 16         | 18        | 31                 | 36        | 40             | 46        |
| Fever                                                                     | 33             | 3          | 9         | 15                 | 45        | 15             | 45        |
| Abdominal pain                                                            | 67             | 15         | 22        | 23                 | 34        | 29             | 43        |
| <b>Total</b>                                                              | <b>167</b>     | <b>36</b>  | <b>22</b> | <b>62</b>          | <b>37</b> | <b>69</b>      | <b>41</b> |
| <b>How much water do you drink per day?</b>                               |                |            |           |                    |           |                |           |
| < 0.5 Liters                                                              | 34             | 8          | 24        | 16                 | 47        | 10             | 29        |
| 0.5 Liters to 1 Liter                                                     | 159            | 24         | 15        | 60                 | 38        | 75             | 47        |
| 1 Liter to 2 Liters                                                       | 142            | 24         | 17        | 47                 | 33        | 71             | 50        |
| More than 2 Liters                                                        | 51             | 12         | 24        | 21                 | 41        | 18             | 35        |
| <b>Total</b>                                                              | <b>386</b>     | <b>68</b>  | <b>18</b> | <b>144</b>         | <b>37</b> | <b>174</b>     | <b>45</b> |

210

211 **Discussion:**



212 Urinary tract infections (UTI) are one of the most common, challenging, and misunderstood diseases that  
213 women experience as outpatients [13]. UTIs are a prevalent health issue among females globally [1],  
214 with a notable prevalence in the United Arab Emirates (UAE), which is increasing at an exponential rate  
215 [14]. The issue of delayed detection of UTIs is very prevalent. It leads to both excessive therapy and  
216 inadequate treatment [13]. If not managed properly and timely or left untreated, UTIs may cause serious  
217 complications like renal impairment, kidney scarring, sepsis, and pyelonephritis [5]. Women's practices,  
218 attitudes, and understanding of urinary tract infections are significant variables that can affect how this  
219 illness is managed and prevented. While a substantial number of studies on this subject have been carried  
220 out globally [9-10, 13], there remains no data specific to the UAE context. This study aims to bridge this  
221 gap by exploring the knowledge, attitudes, and practices of women in the United Arab Emirates about  
222 urinary tract infections (UTIs).

223 Our research revealed several noteworthy findings. Most of the participants (80%) were aware of the  
224 term UTI and half of them were able to identify the correct definition. The vast majority were able to  
225 identify the most common cause of UTIs and the most prevalent symptoms. Additionally, most of them  
226 were also able to report the most appropriate ways of dealing with UTI. Therefore, the results of our  
227 study concluded that most of the respondents exhibited an acceptable level of awareness regarding UTIs.  
228 Our results regarding the knowledge of the participants are consistent with the other studies in the  
229 surrounding region like in Saudi Arabia [10, 15], and were also consistent with a study conducted in the  
230 Netherlands [9]. On the other hand, studies conducted in Bangalore [16] and Egypt [17] suggested that  
231 the participants mostly had poor knowledge and attitude, which may suggest that lower levels of  
232 knowledge are associated with developing countries. Similarly, while assessing the attitudes and  
233 practices of the respondents, we found out that a significant fraction of our study population understood  
234 the seriousness of the condition (46%) and took appropriate measures for the management of UTIs, such  
235 as seeking medical help (48%) or increasing water intake (38.5%). When asked about the outcomes of  
236 General Practitioner (GP) consultation, the participants in our study showed results similar to those of the

237 study group in the Netherlands from Cox SML et al. [9]. In both studies, most participants chose  
238 confirmation of UTI diagnosis as the main outcome behind the GP visit, which shows that patients value  
239 getting the definitive diagnostic information during their consultation. Moreover, in our study, only 3%  
240 of the participants prioritized obtaining an antibiotic prescription compared to 14.3% in the Netherlands  
241 study [9]. These findings may be explained by the wider accessibility of antibiotics without a  
242 prescription in the UAE. Uropathogenic bacteria are notable for their frequent resistance to many drugs  
243 [18]. It is necessary to monitor the antibiotic resistance patterns in UTIs [19].

244 Regarding antibiotic usage, participants were asked about the appropriate way of dealing with a urinary  
245 tract infection and only 6.7% of the participants chose to take antibiotics directly, and only 2.7% took  
246 antibiotics directly when they felt UTI symptoms. This may suggest increased awareness of appropriate  
247 antibiotic use and a desire for more conservative treatment approaches in the UAE population. Moreover,  
248 this trend aligns with global health concerns regarding antibiotic resistance, signifying a positive step  
249 towards responsible antibiotic utilization within the UAE community.

250 Furthermore, we studied the association of knowledge level and demographics, attitudes, and practices  
251 and concluded that the individuals who possessed a high level of knowledge were 18-30 years old and  
252 were well-educated. A similar study was conducted in Malaysia, which stated a possibility that educated  
253 respondents most likely would have studied about UTI or UTI-related topics in their syllabus, which  
254 could be a possible reason for their high level of knowledge [20]. These individuals also understood the  
255 seriousness of UTIs and preferred to seek medical help for treatment. Significant associations were found  
256 between knowledge and age, educational level, and marital status; however, no significant association  
257 was found between the level of knowledge and Emirate which is in contrast to studies conducted in  
258 Saudi Arabia [10, 15].

259 However, certain strengths and limitations of our study need to be acknowledged. This is the first study  
260 that assessed the knowledge, attitudes, and practices of women regarding UTIs in the UAE. Enhancing  
261 patients' understanding, beliefs, and actions about prevalent illnesses plays a crucial part in health

262 education [21]. The results of this study can guide the tailored educational campaigns for women's health  
263 in the UAE. The study's limitations include the possible occurrence of recall bias due to the dependence  
264 on self-reported data, as well as the possibility of participants' replies being influenced by social  
265 desirability or response bias.

266 In conclusion, our study found that most of the respondents had adequate knowledge about UTIs. The  
267 results of this study conclude that most of the women in the UAE exhibited substantial awareness and  
268 behavioral patterns regarding UTIs. Higher knowledge levels were associated with more proactive &  
269 appropriate health behaviors, such as seeking medical attention promptly & drinking more water.

270

271

272

273

274 **References:**

- 275 1. Clinic C. Why UTIs happen differently in men and women [Internet]. Cleveland Clinic. 2023  
276 [cited 2023 Dec 8]. Available from: [https://health.clevelandclinic.org/said-said-worse-urinary-tract-](https://health.clevelandclinic.org/said-said-worse-urinary-tract-infections-infographic)  
277 [infections-infographic](https://health.clevelandclinic.org/said-said-worse-urinary-tract-infections-infographic)
- 278 2. Zeng Z, Zhan J, Zhang K, Chen H, Cheng S. Global, regional, and national burden of urinary  
279 tract infections from 1990 to 2019: an analysis of the global burden of disease study 2019. World  
280 Journal of Urology. 2022 Mar;40(3):755-63. <https://doi.org/10.1007/s00345-021-03913-0>
- 281 3. Weber B. What is the connection between menopause and UTIs? [Internet]. 2022 [cited 2023 Dec  
282 8]. Available from: <https://www.medicalnewstoday.com/articles/menopause-and-uti>
- 283 4. Dube R, Al-Zuheiri ST, Syed M, Harilal L, Zuhaira DA, Kar SS. Prevalence, Clinico-  
284 Bacteriological Profile, and Antibiotic Resistance of Symptomatic Urinary Tract Infections in  
285 Pregnant Women. Antibiotics. 2022 Dec 25;12(1):33. <https://doi.org/10.3390/antibiotics12010033>
- 286 5. Kaur R, Kaur R. Symptoms, risk factors, diagnosis and treatment of urinary tract infections.  
287 Postgraduate Medical Journal. 2021 Dec;97(1154):803-12. [https://doi.org/10.1136/postgradmedj-](https://doi.org/10.1136/postgradmedj-2020-139090)  
288 [2020-139090](https://doi.org/10.1136/postgradmedj-2020-139090)
- 289 6. Urinary tract infection (UTI) - Symptoms and causes - Mayo Clinic [Internet]. Mayo Clinic. 2022  
290 [cited 2023 Dec 9]. Available from: [https://www.mayoclinic.org/diseases-conditions/urinary-tract-](https://www.mayoclinic.org/diseases-conditions/urinary-tract-infection/symptoms-causes/syc-20353447)  
291 [infection/symptoms-causes/syc-20353447](https://www.mayoclinic.org/diseases-conditions/urinary-tract-infection/symptoms-causes/syc-20353447)
- 292 7. Givler DN. Asymptomatic bacteriuria [Internet]. StatPearls - NCBI Bookshelf. 2023 [cited 2023  
293 Dec 9]. Available from: <https://www.ncbi.nlm.nih.gov/books/NBK441848/>
- 294 8. Kassel G. When should you go to the hospital for a urinary tract infection (UTI)? [Internet].  
295 Healthline. 2023 [cited 2023 Dec 9]. Available from: [https://www.healthline.com/health/uti-when-to-](https://www.healthline.com/health/uti-when-to-go-to-hospital#complications)  
296 [go-to-hospital#complications](https://www.healthline.com/health/uti-when-to-go-to-hospital#complications)
- 297 9. Cox SM, van Hoof MW, Lo-A-Foe K, Dinant GJ, Oudhuis GJ, Savelkoul P, Cals JW, de Bont  
298 EG. Cross-sectional internet survey exploring women's knowledge, attitudes and practice regarding

- 299 urinary tract infection-related symptoms in the Netherlands. *BMJ open*. 2022 May 1;12(5):e059978  
300 <http://doi.org/10.1136/bmjopen-2021-059978>
- 301 10. Almaghlouth AK, Alkhalaf RA, Alshamrani AA, Alibrahim JA, Alhulibi BS, Al-Yousef AY,  
302 Alamer AK, Alsuabie SM, Almuhanha SM, Alshehri AD, ALSHAMRANI AA. Awareness,  
303 Knowledge, and Attitude Towards Urinary Tract Infections: An Appraisal From Saudi Arabia.  
304 *Cureus*. 2023 Nov 24;15(11). <https://doi.org/10.7759/cureus.49352>
- 305 11. Vandembroucke JP, Elm EV, Altman DG, Gøtzsche PC, Mulrow CD, Pocock SJ, Poole C,  
306 Schlesselman JJ, Egger M, Strobe Initiative. Strengthening the Reporting of Observational Studies in  
307 Epidemiology (STROBE): explanation and elaboration. *Annals of internal medicine*. 2007 Oct  
308 16;147(8):W-163. <https://doi.org/10.7326/0003-4819-147-8-200710160-00010-w1>
- 309 12. Blogger G. United Arab Emirates (UAE) Population Statistics 2023 | GMI [Internet]. Official  
310 GMI Blog. 2023 [cited 2023 Dec 8]. Available from: [https://www.globalmediainsight.com/blog/uae-](https://www.globalmediainsight.com/blog/uae-population-statistics)  
311 [population-statistics](https://www.globalmediainsight.com/blog/uae-population-statistics)
- 312 13. Ata A, Hussain W, Malik J, Abbasi S, Mehmood A, Khan AH, Parvez A, Abdullah A, Abbasi  
313 AS, Shah A. Knowledge Attitude and Practices Regarding Urinary Tract Infection Among Pakistani  
314 Diabetic Females. *Pakistan Journal of Medical Research*. 2023 Nov 23;62(3):128-34.  
315 <https://www.pjmr.org.pk/index.php/pjmr/article/view/495>
- 316 14. Zhu C, Wang DQ, Zi H, Huang Q, Gu JM, Li LY, Guo XP, Li F, Fang C, Li XD, Zeng XT.  
317 Epidemiological trends of urinary tract infections, urolithiasis and benign prostatic hyperplasia in 203  
318 countries and territories from 1990 to 2019. *Military Medical Research*. 2021 Dec;8:1-2.  
319 <https://doi.org/10.1186/s40779-021-00359-8>
- 320 15. Alshahrani M, Alzahrani AB, Alzahrani AA, Alqhtani AM, Alwabel HH, Asiri KM, Mohammed  
321 Y, Abumelha MD, Alshahrani RS, Alshahrani AA, Alhussain RM. Knowledge, Attitude and Practice  
322 of Urinary Tract Infection among Female in Aseer Region. *Bahrain Medical Bulletin*. 2022 Mar  
323 1;44(1). [https://www.bahrainmedicalbulletin.com/MARCH\\_2022/BMB-22-153.pdf](https://www.bahrainmedicalbulletin.com/MARCH_2022/BMB-22-153.pdf)

- 324 16. Muchukota S, Muchukota B, Mekkanti MR, Mounika P, Mathappan R. A cross sectional study  
325 on knowledge, attitude & practice towards personal hygiene in women with urinary tract infection and  
326 providing patient counselling in esi hospital bangalore. UPI Journal of Pharmaceutical, Medical and  
327 Health Sciences. 2020:5-9. <https://doi.org/10.37022/jpmhs.v3i2.20>
- 328 17. El Lawindi, Mona & Sayed, Hanan & El shafei, Arwa & Hayek, Noha & Nour, Hani. Assessment  
329 of Urinary Tract Infections' Risk Factors and Knowledge among Attendees of Theodor Bilharz  
330 Research Institute, Giza, Egypt.. International Public Health Forum. 2014;1(1):25-9. (PDF)  
331 [Assessment of Urinary Tract Infections' Risk Factors and Knowledge among Attendees of Theodor](#)  
332 [Bilharz Research Institute, Giza, Egypt. \(researchgate.net\)](#)
- 333 18. Hrbacek J, Cermak P, Zachoval R. Current antibiotic resistance patterns of rare uropathogens:  
334 survey from Central European Urology Department 2011–2019. BMC urology. 2021 Dec;21:1-8.  
335 <https://doi.org/10.1186/s12894-021-00821-8>
- 336 19. Huang L, Huang C, Yan Y, Sun L, Li H. Urinary tract infection etiological profiles and antibiotic  
337 resistance patterns varied among different age categories: a retrospective study from a tertiary general  
338 hospital during a 12-year period. Frontiers in Microbiology. 2022 Jan 27;12:813145.  
339 <https://doi.org/10.3389/fmicb.2021.813145>
- 340 20. Selamat NW, Martinez KP, Subrain G, Auamnoy T. THE CORRELATION BETWEEN  
341 AWARENESS AND ATTITUDE DOMAINS ON URINARY TRACT INFECTION (UTI) AMONG  
342 BURAPHA UNIVERSITY STUDENTS IN CHONBURI, THAILAND. Malaysian Journal of Public  
343 Health Medicine. 2021 Apr 24;21(1):21-8. <https://doi.org/10.37268/mjphm/vol.21/no.1/art.444>
- 344 21. Kruszewski B. What is Patient Education? | Lecturio Medical [Internet]. Lecturio. 2023 [cited  
345 2024 Jan 20]. Available from: [https://www.lecturio.com/blog/medical/what-is-patient-education-and-](https://www.lecturio.com/blog/medical/what-is-patient-education-and-why-is-it-important/)  
346 [why-is-it-important/](https://www.lecturio.com/blog/medical/what-is-patient-education-and-why-is-it-important/)
